# Supplementary material for: A printable asymmetrical surface pattern for responsive directional liquid transport
Source: Royal Society of Chemistry journal article supplement (doi:10.1039/d5ta05588a), 2025-01-01
Supplement: d5ta05588a4.pdf [file d5ta05588a4.pdf]

## Supporting Information

### **Printable asymmetrical surface pattern for responsive directional liquid transport**

*Yi Zhang*<sup>a,b,c</sup>, *Danfeng Pei*<sup>a,b,c</sup>, *Mingjie Li*<sup>a,b,c</sup>, *Chaoxu Li*<sup>a,b,c,d,\*</sup>

<sup>a</sup> Group of Biomimetic Smart Materials, CAS Key Laboratory of Bio-Based Materials, Qingdao Institute of Bioenergy and Bioprocess Technology, Chinese Academy of Sciences, Songling Road 189, Qingdao 266101, P. R. China

<sup>b</sup> Shandong Energy Institute, Songling Road 189, Qingdao, China

<sup>c</sup> Qingdao New Energy Shandong Laboratory, Songling Road 189, Qingdao, China

<sup>d</sup> Center of Material and Optoelectronics Engineering, University of Chinese Academy of Sciences, 19A Yuquan Road, Beijing 100049, P. R. China

#### **This PDF file includes:**

Figures S1 to S12

Legends for Movies S1 to S3

#### **Other Supplementary Materials for this manuscript include the following:**

Movies S1 to S3

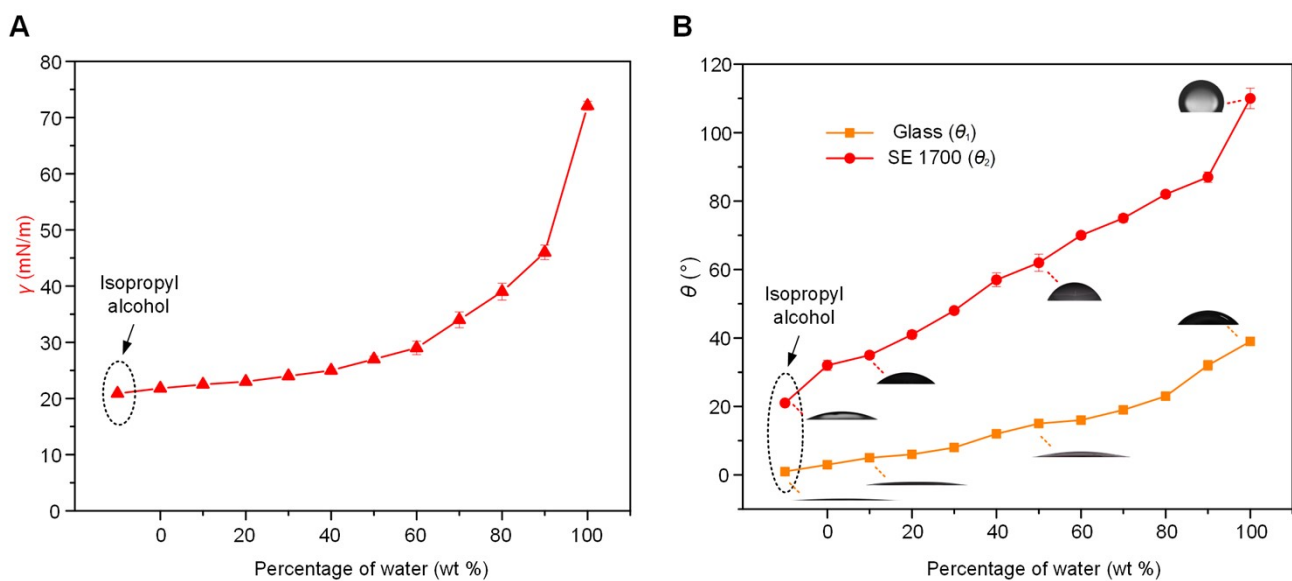

**Fig S1.** (A) Surface tension of isopropyl alcohol and water-ethanol mixtures with varied mass fraction. (B) Contact angles of isopropyl alcohol and water-ethanol mixtures on glass substrate and SE1700 silicone, respectively.

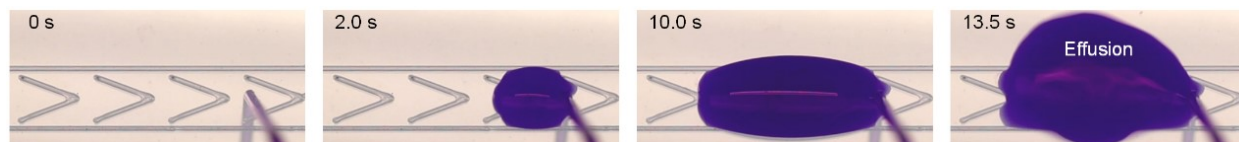

**Fig S2.** Transport behavior of ethanol with 80 wt% water on asymmetrical patterned surface.

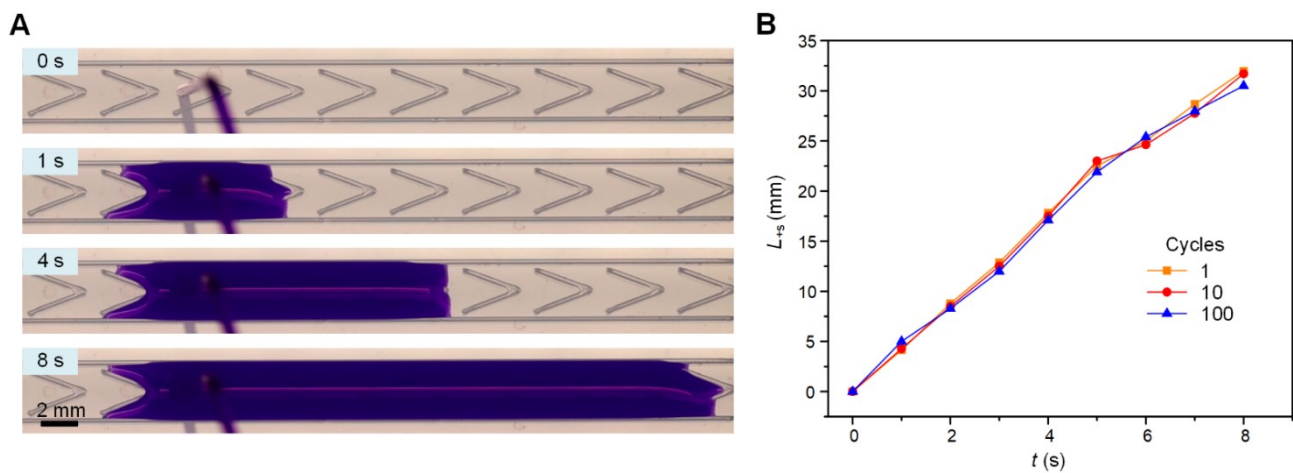

**Fig S3.** (A) The unidirectional liquid transport behavior on the asymmetric functional surface after 100 repetitive experiments. (B) Durability test of the asymmetric functional surface.

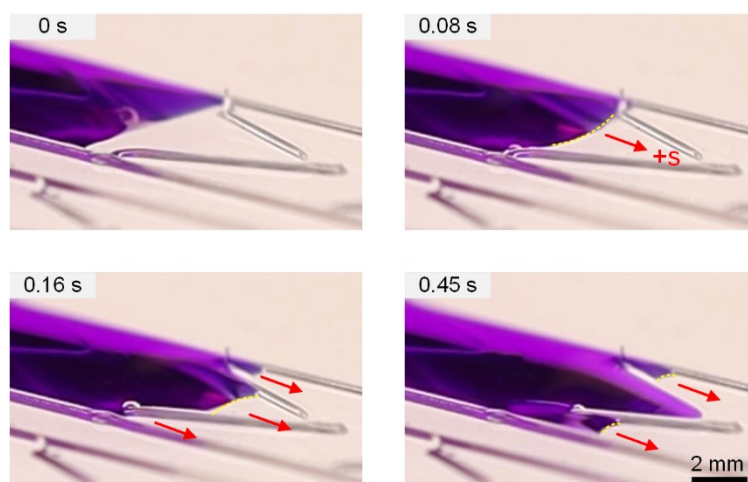

**Fig S4.** Detailed time-lapsed images of the unidirectional transport process of liquid (ethanol containing 10 wt% water) on the surface.

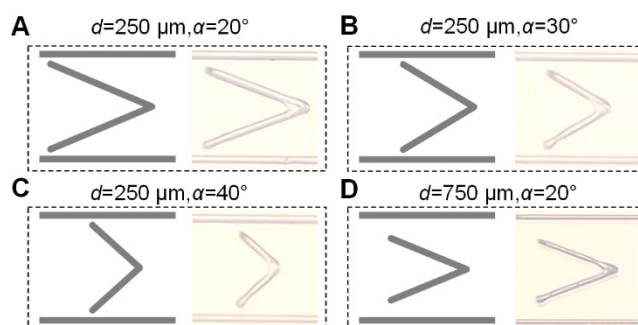

**Fig S5.** Different geometric parameters design of the V patterns.

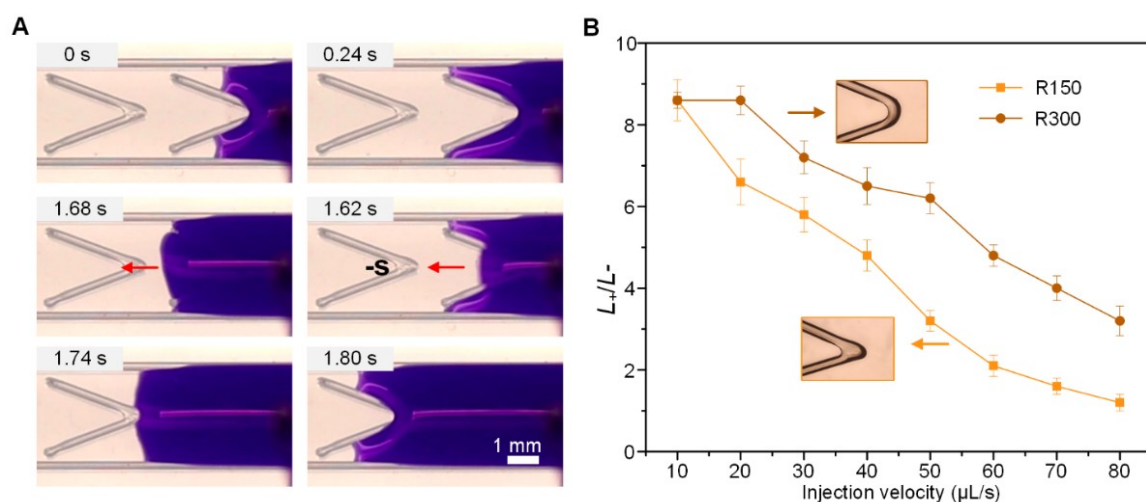

**Fig S6.** (A) Time-sequence images of liquid effusion from vertex of V-letters in -s direction due to Laplace pressure of concave liquid transport front. (B) Influence of vertex radius on liquid transport distance ratio ( $L_+/L_-$ ). Liquid: ethanol containing 10 wt% water.

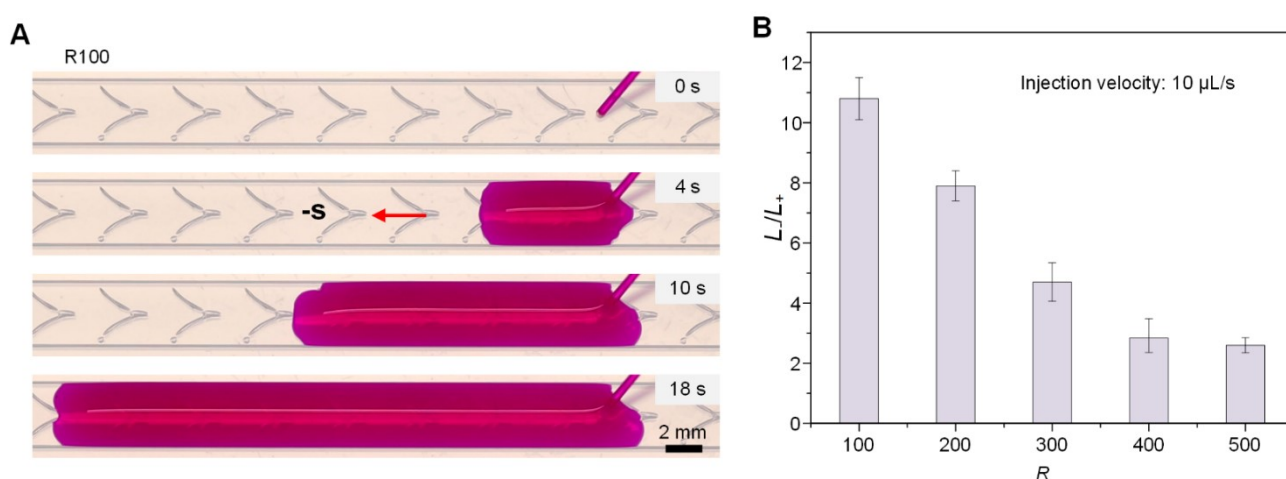

**Fig S7.** (A) Effect of small vertex radius  $R$  of V letters on directional liquid transport in -s direction. (B) Influence of vertex radius  $R$  on liquid transport distance ratio ( $L_+/L_-$ ). Liquid: ethanol containing 50 wt% water.

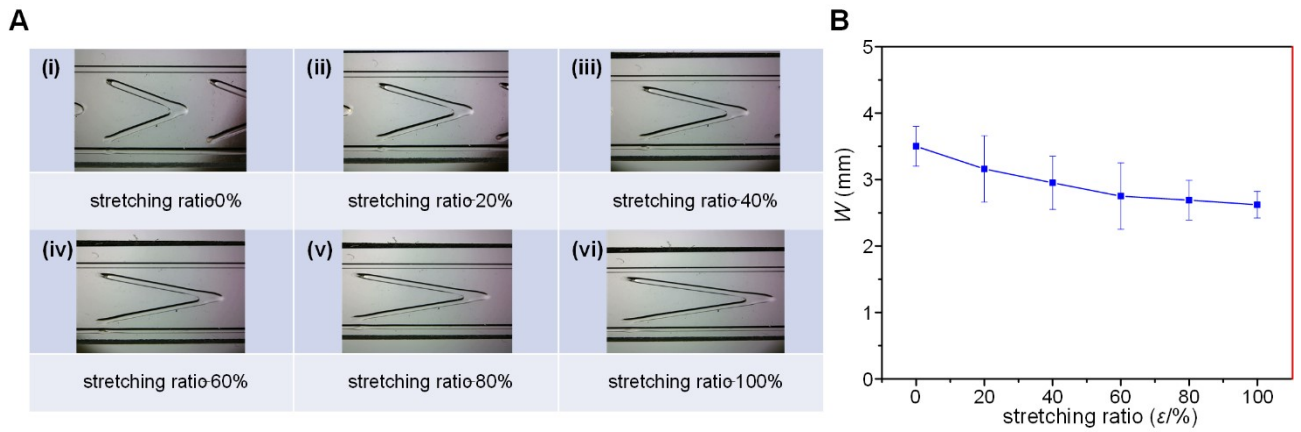

**Fig S8.** (A) Surface morphology after stretching. (B) Variations of channel width  $W$  against the stretching ratio.

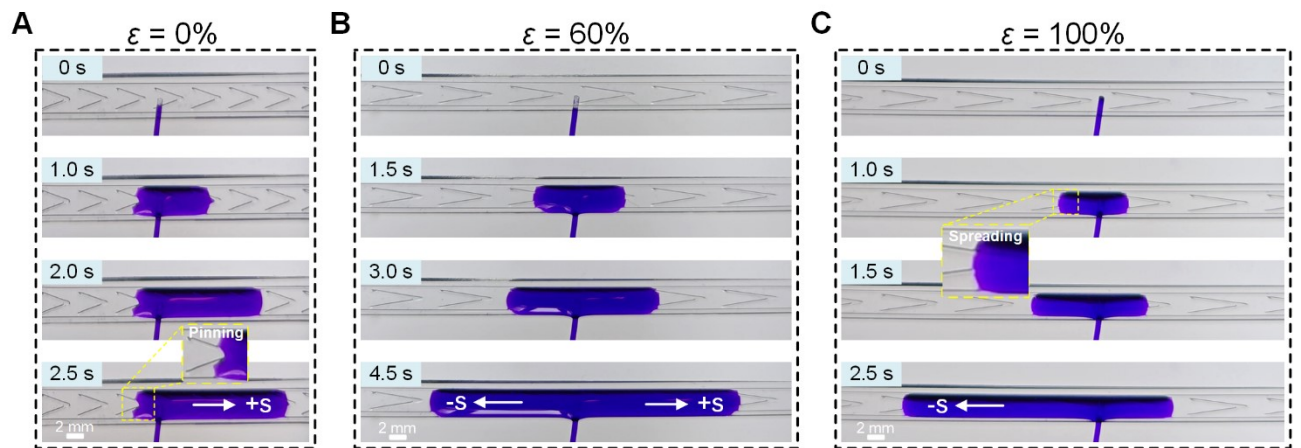

**Fig S9.** The liquid transport state at a surface stretching ratio of (A) 0 %, (B) 60 % and (C) 100 %.

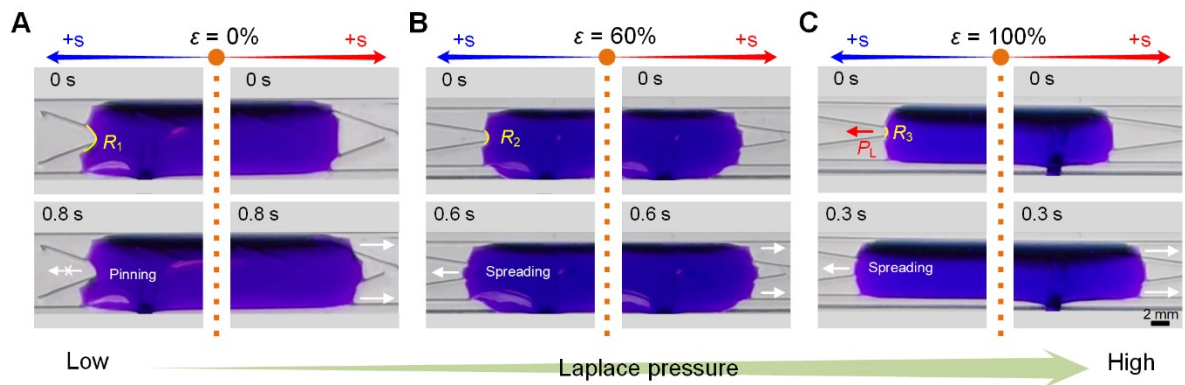

**Fig S10.** The morphology of liquid precursor in +s and -s direction with different surface stretching

ratio of (A) 0 %, (B) 60 % and (C) 100 %.

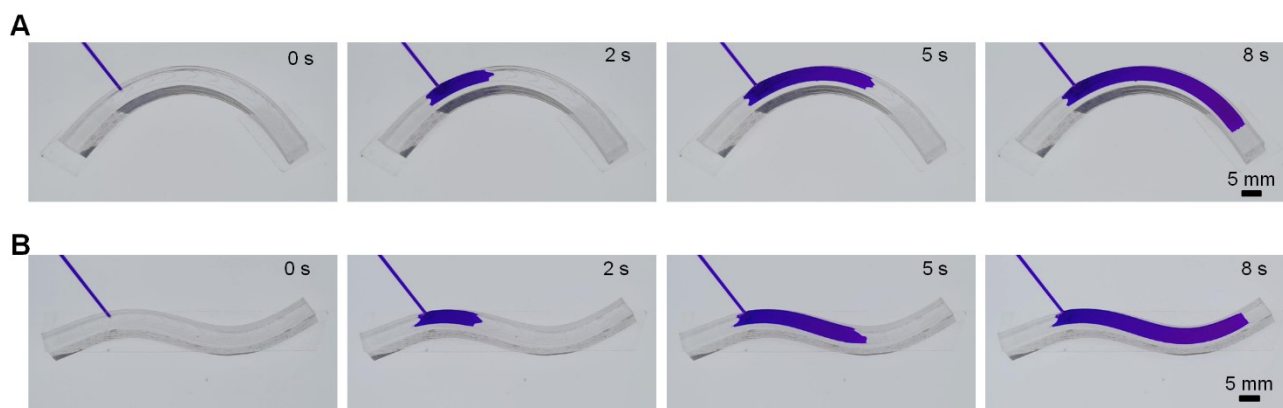

**Fig S11.** Directional liquid transport on soft patterned surfaces after bending.

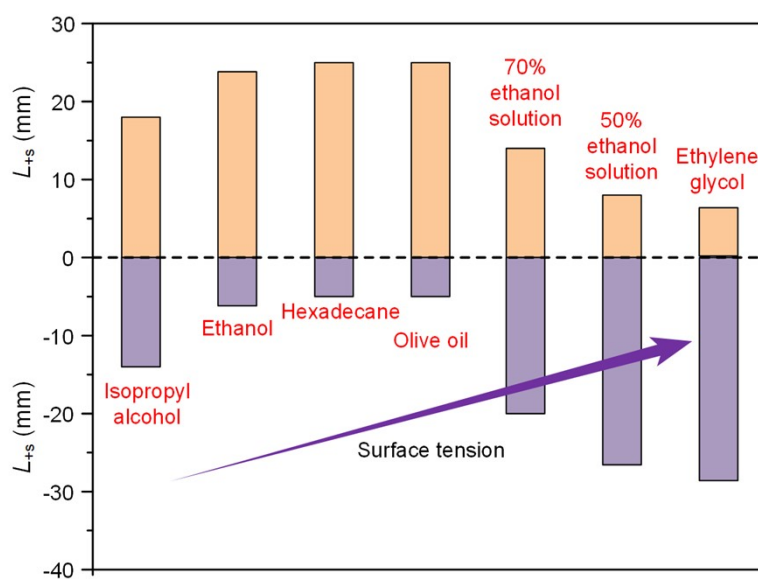

**Fig S12.** Liquid transport distance ratio ( $L_{+s}/L_{-s}$ ) for different liquids.

## Supplementary Movies

**Supplementary Movie 1.** Three liquid transport modes based on the surface tension of liquids.

**Supplementary Movie 2.** Strain responsiveness of directional liquid transport.

**Supplementary Movie 3.** Isolation of liquids with different surface tension.
